RESEARCH ARTICLE

# Spatial variation in the morphological traits of *Pocillopora verrucosa* along a depth gradient in Taiwan

Derek Soto<sup>1,2,3</sup>, Stephane De Palmas<sup>1,2,3</sup>, Ming Jay Ho<sup>1,3,4</sup>, Vianney Denis<sup>5\*</sup>, Chaolun Allen Chen<sup>1,2,3,5\*</sup>

**1** Biodiversity Program, Taiwan International Graduate Program, Academia Sinica and National Taiwan Normal University, Taipei, Taiwan, **2** Department of Life Science, National Taiwan Normal University, Taipei, Taiwan, **3** Biodiversity Research Center, Academia Sinica, Taipei, Taiwan, **4** Green Island Marine Research Station, Academia Sinica, Ludao, Taiwan, **5** Institute of Oceanography, National Taiwan University, Taipei, Taiwan

\* [vianneydennis@ntu.edu.tw](mailto:vianneydennis@ntu.edu.tw) (VD); [cac@gate.sinica.edu.tw](mailto:cac@gate.sinica.edu.tw) (CAC)

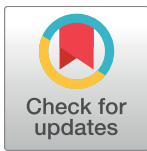

**OPEN ACCESS**

**Citation:** Soto D, De Palmas S, Ho MJ, Denis V, Chen CA (2018) Spatial variation in the morphological traits of *Pocillopora verrucosa* along a depth gradient in Taiwan. PLoS ONE 13(8): e0202586. <https://doi.org/10.1371/journal.pone.0202586>

**Editor:** Mónica Medina, Pennsylvania State University, UNITED STATES

**Received:** May 31, 2018

**Accepted:** August 6, 2018

**Published:** August 17, 2018

**Copyright:** © 2018 Soto et al. This is an open access article distributed under the terms of the [Creative Commons Attribution License](https://creativecommons.org/licenses/by/4.0/), which permits unrestricted use, distribution, and reproduction in any medium, provided the original author and source are credited.

**Data Availability Statement:** All relevant data are within the paper and its Supporting Information files.

**Funding:** DS and SDP are recipients of the Taiwan International Graduate Program Fellowship. This research was funded by a Taiwan Ministry of Science and Technology Grant number 103-2621-B-001-004-MY3 to CAC (<https://www.most.gov.tw/?l=en>) and Taiwan Ministry of Science and Technology Grant number 106-2611-M-002-008 to VD. The funders had no role in study design,

## Abstract

*Pocillopora verrucosa* is a widely distributed depth-generalist coral that presents plasticity in its skeletal macro- and microstructure in response to environmental gradients. Light and water movement, which covary with depth, are the main environmental drivers of morphological plasticity in this genus; however, assessing environmentally-induced plasticity may be confounded by the extent of interspecific variation in *Pocillopora*. We examine the morphology of 8 typed *P. verrucosa* specimens collected along a depth gradient ranging from 7 to 45 meters and comprising 3 sites throughout Ludao, Taiwan. We measured 36 morphological characters, 14 which are novel, in 3 regions on the corallum—the apex, branch and base—in order to quantify their relationship to site and depth. We found significant correlation between depth and 19 morphological characters, notably branch verruca area, branch verruca height, base verruca spacing, base spinule length, and branch corallite area. 60% of microstructural characters and 25% of macrostructural characters showed a correlative relation to depth, suggesting that depth acclimatization is manifested primarily at the microstructural level. Canonical discriminant analysis of all morphometric characters by depth supports clustering into 3 groups: an overlapping 7m and 15m group, a 23-30m group, and a 38-45m group. Canonical discriminant analysis by site supports clustering into low- and high-current sites, differentiated primarily by branch septa width, base septa width, pre-terminal branch width, terminal branch maximum length, and terminal branch minimum length. We conclude that distinctive patterns of morphological variation in mesophotic specimens of *P. verrucosa* could reflect the effects of abiotic parameters such as light and water flow. Elucidating the mechanisms behind the morphological changes that occur in response to environmental gradients can help clarify the role that physiological plasticity plays in the acclimatization of corals to the unique environmental settings of mesophotic coral ecosystems.

data collection and analysis, decision to publish, or preparation of the manuscript.

**Competing interests:** The authors have declared that no competing interests exist.

## Introduction

Scleractinian coral taxonomy is traditionally based on descriptions of skeletal micro- and macrostructures, yet these characteristics can be altered in novel environments or in response to environmental change [1] through a phenomenon known as plasticity [2–5]. Morphological plasticity, which often transcends species boundaries, is a source of considerable confusion in the identification and taxonomy of many scleractinian corals [4, 6, 7] and may lead to the inclusion of misidentified species in a study [8]. In this context, the identification of stable morphological characters, synthesized with molecular taxonomy, is becoming increasingly important to an ongoing effort to strengthen species delineations in corals [9,10]. Despite its relevance to taxonomy and coral ecology, studies on morphological plasticity in corals—particularly along environmental gradients—are uncommon; out of more than 1300 extant scleractinian species, relatively few have been investigated for plastic responses [6].

The environmental setting of mesophotic coral ecosystems (MCEs) is characterized primarily by reduced light availability as a function of depth [11,12]. Light availability, along with water movement, are the main environmental parameters that influence coral morphology [6,13]; yet these parameters may be significantly attenuated at mesophotic depths [14]. In comparison to corals from shallow waters, corals that inhabit mesophotic environments may possess unique characteristics that optimize light harvesting and photosynthetic efficiency [15–17] and reduce oxidative stress [18, 19]. Traits exhibited by depth-specialized corals include: platy morphology [20], skeletal structures that increase how much light travels through coral tissue [21,22], unique microbiomes [23], increased photosynthetic pigments [12], mono-layered symbiont cell arrangements [24], and *Symbiodinium* clade specificity [25,26]. Similarly, coral species with broad bathymetric distributions, commonly termed depth-generalists, may exhibit morphological responses to depth gradients [27]. A change in phenotype in response to environmental variation and achieved through non-genetic modification is termed acclimatization [28]. For example, branching corals such as Red Sea *Stylophora pistillata* present flatter morphologies and thinner branches in mesophotic environments [29]. Shade-adjusted colonies of *Montipora monasteriata* photoacclimate by means of growth patterns that preferentially expand surface area instead of volume [30]. Flatter colony morphologies occurring in deep water require less biomass, which in turn reduces photosynthetic demand [31]. At the micro-structural scale, high calical relief in shallow *Orbicella annularis* (*ex. Montastraea annularis*) provides shading effects as a protective adaptation against UV radiation, while flatter calices in deeper morphs may serve to increase exposure to incident light [32]. Even though the interaction between light and depth on coral traits is well documented [32–38], the acclimatory potential of zooxanthellate scleractinian corals inhabiting MCEs remains poorly understood [39–41].

Corals within the genus *Pocillopora* possess a broad geographical range—spanning the tropical Pacific Ocean, Indian Ocean, and Red Sea—and comprises tropical to temperate latitudes and shallow to mesophotic settings [42,43]. Concomitant with this ample range is exposure to heterogeneous habitats and environmental conditions, which include marginal environments [44,45]. Interspecific variation in morphological traits is frequently reported in *Pocillopora*, but it is often difficult to distinguish from intraspecific morphological plasticity [46–53].

*Pocillopora verrucosa* is a submassive branching coral common in shallow-water [54] and some mesophotic habitats [55,56] throughout the tropical Indo-Pacific, Eastern Pacific and Red Sea. *P. verrucosa* is described as possessing calices ranging 0.5–1.3mm in diameter, 2 cycles of irregularly sized and spaced septa, verrucae ranging 3–7mm in diameter and 2–6mm in height, and minimum branch diameter that typically does not exceed approximately twice the diameter of the smallest branch [49, 57]. *P. verrucosa* is highly plastic and presents

developmental plasticity in larvae exposed to acidified environments [58], metabolic plasticity in response to temperature [59,60], physiologic plasticity, and symbiont specificity in response to depth and light gradients [61–63], and morphological plasticity in response to hydrodynamic flow patterns [64–67]. In the waters off of Ludaο, Taiwan, *P. verrucosa* occupies a known vertical distribution ranging from 7–60m depth [68], making it ideal for studying the interaction between morphology and depth.

Here we examine how morphological traits in *P. verrucosa* relate to site and depth by measuring 36 characters in validated *P. verrucosa* specimens collected along a depth gradient ranging from shallow to upper mesophotic regions in Ludaο, Taiwan. We then further examined the relationship between depth and morphological trait structure using a regressive analysis and a multivariate statistical approach. We postulate that *P. verrucosa* originating from mesophotic environments will present acclimatory changes in their morphology when compared to their shallow water counterparts.

## Materials & methods

In order to characterize differences in morphology in response to depth, we measured 36 morphological characters in *Pocillopora verrucosa* collected from 4 depth profiles ranging from 7 to 45m. Samples were collected from 3 sites encompassing Ludaο (also known as Green Island), an offshore volcanic island located off the southeast coast of Taiwan (Fig 1), during 4 field trips spanning 2016 to 2017. Coral fragments were collected by divers, using recreational and technical SCUBA diving, at four depth intervals—7m, 15m, 23–30m and 38–45m ( $\pm 1.25$ m tidal range)—and three sites—Guiwan (22.64022°N, 121.48113°E), Dabaisha (22.63678°N, 121.49026°E) and Gongguan (22.67750°N, 121.49415°E)—off the southern, southwestern and northern coasts of Ludaο, respectively. Springtime marine environmental conditions in Guiwan measured by CTD, range between 24.5–25.2°C and 34.6–34.9 PSU salinity from the surface to 50m [68]. Light availability ( $PAR_{\text{surface}} = 1474 \mu\text{mol (photons) m}^2/\text{s}$ ) decreases exponentially from the surface to 3–8% total PAR at 50m [68]. Ludaο interrupts the northeastward flow of the Kuroshio current and creates a wake off the island's northeastern coast [69], consequently, current velocity at Dabaisha and Gongguan sites ranges between 0–0.5 m/s, while current at Guiwan ranges between 0.7–1.2 m/s [70].

Colonies possessing *Pocillopora verrucosa*-like morphology were identified following [57]. Colony fragments were collected and transported to the lab where tissue sections were subsampled for molecular analyses. Skeletons were tagged, bleached, rinsed and dried for analysis of morphometric characters. Species identity for coral specimens was assessed through DNA sequencing of the open reading frame in the mitochondrial genome (*mtORF*) (detailed in de Palmas et al. 2018, *in preparation*). 85 total colonies were retained for this study (Table 1). Eight characters were measured at the gross colony level (macrostructural characters, hereafter) and 28 microstructural characters (Table 2) (Fig 2A and 2B) were measured within three distinct regions on the corallum designated as apex, branch, and base regions (microstructural characters, hereafter) (Fig 3). Independence of morphological characters was verified by checking a correlation plot for evidence of collinearity (S1 Fig). The apex region is delimited by the area at the tip of the branches (Fig 2B) and is distinguished by its large polygonal corallites lacking septa or columella and a narrow coenosteum containing broad, dentate spinules (Fig 3A, 3D, 3G and 3J). Verrucae in the apex are short and underdeveloped. The branch region is designated by the area on the branches proximal to the apex region (Fig 2B). This area is characterized by circular or oval plocoid corallites containing well-defined septa; columella may be present (Fig 3B, 3E, 3H and 3K). The coenosteum within the branches is broader than in the apical region and contains many rows of long thorn- or needle-shaped spinules.

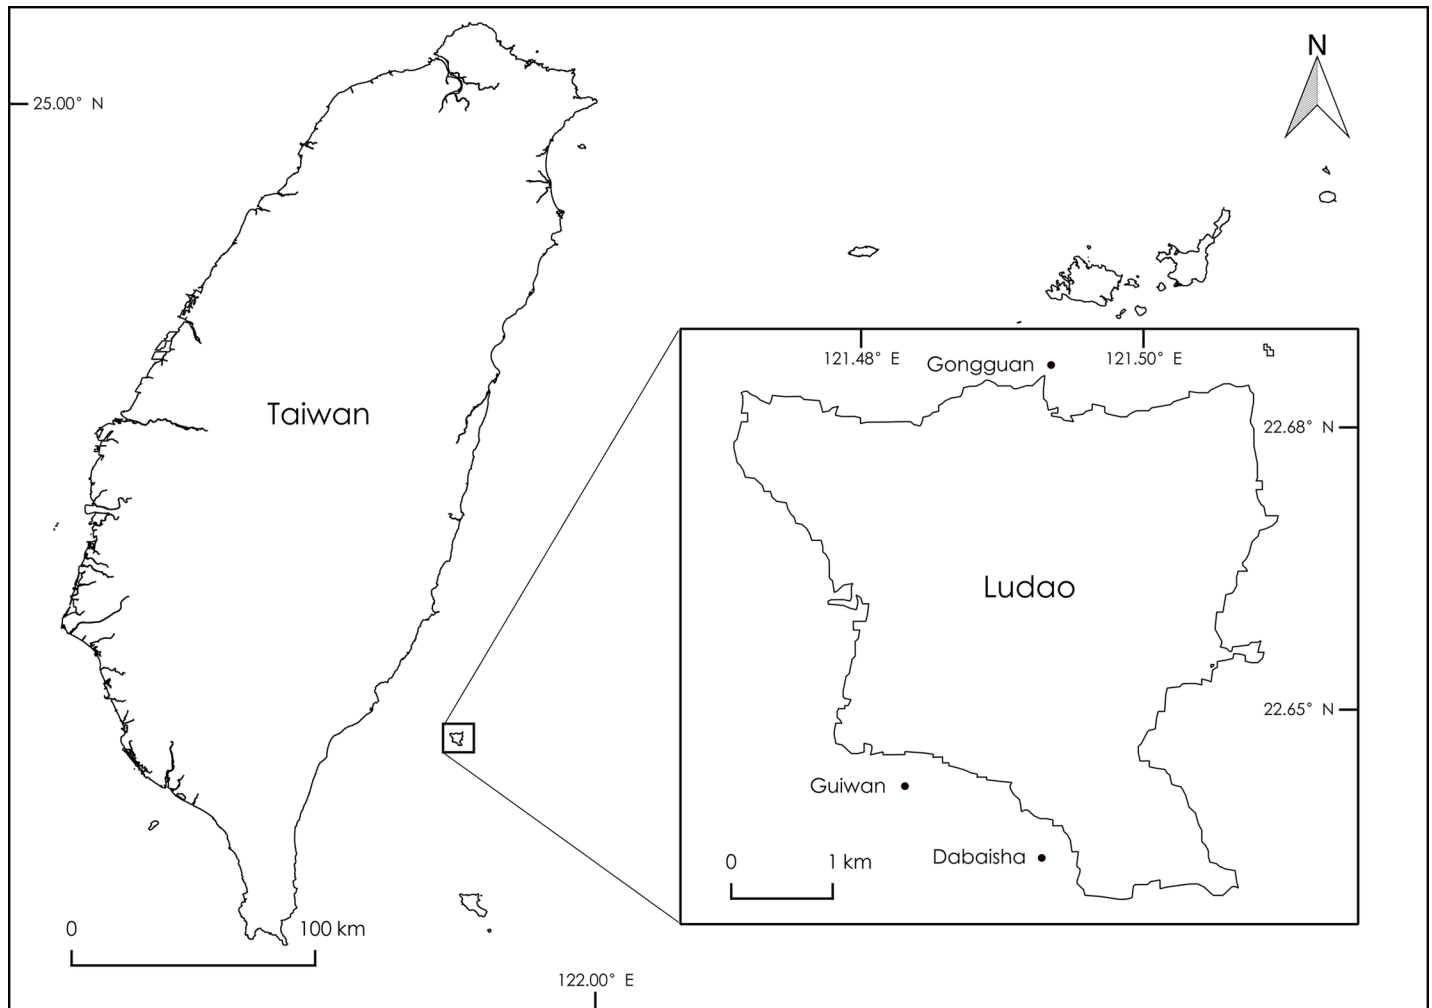

**Fig 1. Study sites at Ludao, Taiwan.** Samples were collected at 7m, 15m, 23-30m, and 38-45m depths at Guiwan, Dabaisha, and Gongguan reefs.

<https://doi.org/10.1371/journal.pone.0202586.g001>

Verrucae in this region are columnar in shape, and abundant. The base is defined as the primary stem that forms the principal support to which all secondary branches of the corallum attach and that anchors the colony to the substrate (Fig 2B). The base region is distinguished by round or oval-shaped corallites that may or may not possess internal structure and a relatively extensive coenosteum that contains abundant rows of spinules (Fig 3C, 3F, 3I and 3L). Characters were digitally measured using an Olympus SZ2-ILST microscope and an Olympus DP72 camera coupled with cellSens Standard software calibrated using an objective

**Table 1. Samples collected by site and depth.**

| Site Depth | Guiwan | Dabaisha | Gongguan | Total |
|------------|--------|----------|----------|-------|
| 7m         | 3      | 5        | 3        | 11    |
| 15m        | 9      | 9        | 2        | 20    |
| 23-30m     | 9      | 6        | 7        | 22    |
| 38-45m     | 12     | 9        | 11       | 32    |
| Total      | 33     | 29       | 23       | 85    |

<https://doi.org/10.1371/journal.pone.0202586.t001>

**Table 2. Morphological characters measured in this study, and references to studies on *Pocillopora* which incorporate quantitative assessments of each character.**

| Character                         | Description                                                                                                                            | Replicates per Colony | References          |
|-----------------------------------|----------------------------------------------------------------------------------------------------------------------------------------|-----------------------|---------------------|
| Apex Spinule Length               | Maximum length of apical spinule                                                                                                       | 10                    | -                   |
| Apex Spinule Width                | Maximum width of apical spinule                                                                                                        | 10                    | -                   |
| Apex Spinule Spacing              | Minimum distance between adjacent apical spinules                                                                                      | 10                    | -                   |
| Apex Corallite Area               | Area demarcated by rim of apical corallite                                                                                             | 10                    | [7]                 |
| Apex Corallite Spacing            | Minimum distance between adjacent apical corallites.                                                                                   | 10                    | [7]                 |
| Apex Verruca Area                 | Area demarcated by base of apical verruca                                                                                              | 10                    | [7, 10]             |
| Apex Verruca Spacing              | Minimum distance between adjacent apical verruca                                                                                       | 10                    | [7]                 |
| Apex Verruca Height               | Length of apical verruca measured from base to tip                                                                                     | 10                    | [7]                 |
| Base Spinule Length               | Maximum length of base spinule                                                                                                         | 10                    | [72]                |
| Base Spinule Width                | Maximum width of base spinule                                                                                                          | 10                    | [72]                |
| Base Spinule Spacing              | Minimum distance between adjacent base spinules                                                                                        | 10                    | -                   |
| Base Septa Width                  | Maximum width of basal primary corallite septa                                                                                         | 10                    | -                   |
| Base Septa Length                 | Maximum length of basal primary corallite septa                                                                                        | 10                    | -                   |
| Base Corallite Area               | Area demarcated by rim of basal corallite                                                                                              | 10                    | -                   |
| Base Corallite Spacing            | Minimum distance between adjacent base corallites.                                                                                     | 10                    | -                   |
| Base Verruca Area                 | Area demarcated by base of basal verruca                                                                                               | 10                    | -                   |
| Base Verruca Spacing              | Minimum distance between adjacent basal verruca                                                                                        | 10                    | -                   |
| Base Verruca Height               | Length of basal verruca measured from base to tip                                                                                      | 10                    | -                   |
| Branch Spinule Length             | Maximum length of branch spinule                                                                                                       | 10                    | [72]                |
| Branch Spinule Width              | Maximum width of branch spinule                                                                                                        | 10                    | [72]                |
| Branch Spinule Spacing            | Minimum distance between adjacent branch spinules                                                                                      | 10                    | -                   |
| Branch Septa Width                | Maximum width of branch primary corallite septa                                                                                        | 10                    | -                   |
| Branch Septa Length               | Maximum length of branch primary corallite septa                                                                                       | 10                    | -                   |
| Branch Corallite Area             | Area demarcated by rim of branch corallite                                                                                             | 10                    | [7]                 |
| Branch Corallite Spacing          | Minimum distance between adjacent branch corallites.                                                                                   | 10                    | [7]                 |
| Branch Verruca Area               | Area demarcated by base of branch verruca                                                                                              | 10                    | [7]                 |
| Branch Verruca Spacing            | Minimum distance between adjacent branch verruca                                                                                       | 10                    | [7,10]              |
| Branch Verruca Height             | Length of branch verruca measured from base to tip                                                                                     | 10                    | [7]                 |
| Colony Density                    | Colony density calculated using Archimedes' Principle.                                                                                 | 1                     | [73]                |
| Terminal Branch Maximum Width     | Maximum diameter measured halfway between the branch tip and the branching point of the ultimate ramification                          | 1                     | [7, 10, 67, 74, 75] |
| Terminal Branch Minimum Width     | Minimum diameter measured halfway between the branch tip and the branching point of ultimate ramification                              | 1                     | [7, 10, 67, 74, 75] |
| Pre-terminal Branch Maximum Width | Maximum diameter measured halfway between the branching point of ultimate ramification and branching point of penultimate ramification | 1                     | [7, 10]             |
| Pre-terminal Branch Minimum Width | Minimum diameter measured halfway between the branching point of ultimate ramification and branching point of penultimate ramification | 1                     | [7, 10]             |
| Terminal Branch Maximum Length    | Length of longest ultimate branch measured as the distance between branch tip and branching point of ultimate ramification             | 1                     | [10]                |
| Terminal Branch Minimum Length    | Length of shortest ultimate branch measured as the distance between branch tip and branching point of ultimate ramification            | 1                     | [10]                |
| Mean Branching Angle              | Interior angle measured between adjacent ramifications                                                                                 | 5–10                  | [7, 74]             |

<https://doi.org/10.1371/journal.pone.0202586.t002>

micrometer slide. Colony density was calculated by measuring dry and buoyant colony weight in deionized water applied to Archimedes' Principle modified to calculate the density of an object [71].

Statistical tests were performed using R version 3.4.2 [76]. We estimated the relationship between morphological traits and depth using Kendall's rank correlation coefficient from R

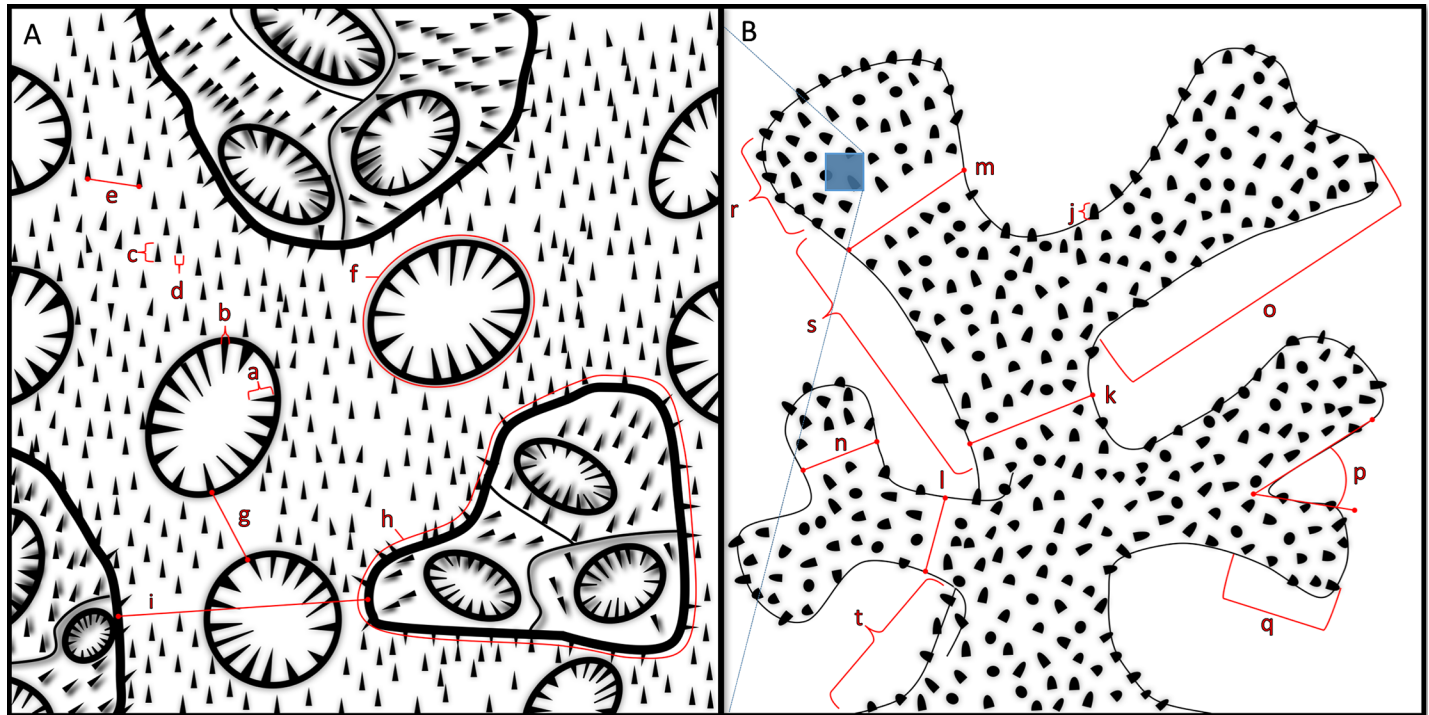

**Fig 2. Schematic of morphological traits and regions measured in this study at A. detailed and B. gross perspectives.** Features not drawn to scale. a. Septa Length b. Septa Width c. Spinule Length d. Spinule Width e. Spinule Spacing f. Corallite Area g. Corallite Spacing h. Verruca Area i. Verruca Spacing j. Verruca Height k. Pre-terminal Branch Maximum Width l. Pre-terminal Branch Minimum Width m. Terminal Branch Maximum Width n. Terminal Branch Minimum Width o. Terminal Branch Maximum Length p. Mean Branching Angle q. Terminal Branch Minimum Length r. Apex Region s. Branch Region t. Base Region.

<https://doi.org/10.1371/journal.pone.0202586.g002>

package “stats”. Morphological characters were assessed for multicollinearity via a correlation matrix created using the R package “corrplot”. Pairwise characters possessing a Pearson’s  $r > 0.8$  ( $n = 1$ ) were considered collinear following [77] and one character was retained for discriminant analysis. Normality was assessed via the Shapiro-Wilk test and data were log-transformed in order to meet the assumptions of parametric tests. Multivariate homogeneity of variances was assessed using “vegan” package [78]. Canonical discriminant analyses were visualized using the R package “candisc” [79].

## Results

Out of 28 microstructural characters (Fig 4) and 8 structural characters (Fig 5) measured, significant correlation coefficients were found for 19 characters: apex spinule length, apex spinule spacing, apex verruca area, apex verruca height, base spinule length, base spinule width, base corallite area, base corallite spacing, base verruca area, base verruca spacing, branch spinule length, branch spinule width, branch spinule spacing, branch septa length, branch corallite area, branch verruca area, branch verruca height, terminal branch maximum width, and terminal branch minimum length (Table 3). However, significant correlation coefficients that explain greater than 30% of the observed variance were found for branch verruca area, ( $\tau = -0.50$ ), branch verruca height ( $\tau = -0.39$ ), base verruca spacing ( $\tau = 0.37$ ), base spinule length ( $\tau = -0.35$ ), and branch corallite area ( $\tau = -0.30$ ). Significant correlations to depth were found in eleven previously described characters (50%) and eight (57%) newly described characters. Trait distribution varies along a depth gradient (S2 Fig). The following characters showed no correlation to depth: apex spinule width, apex corallite area, apex corallite spacing, apex

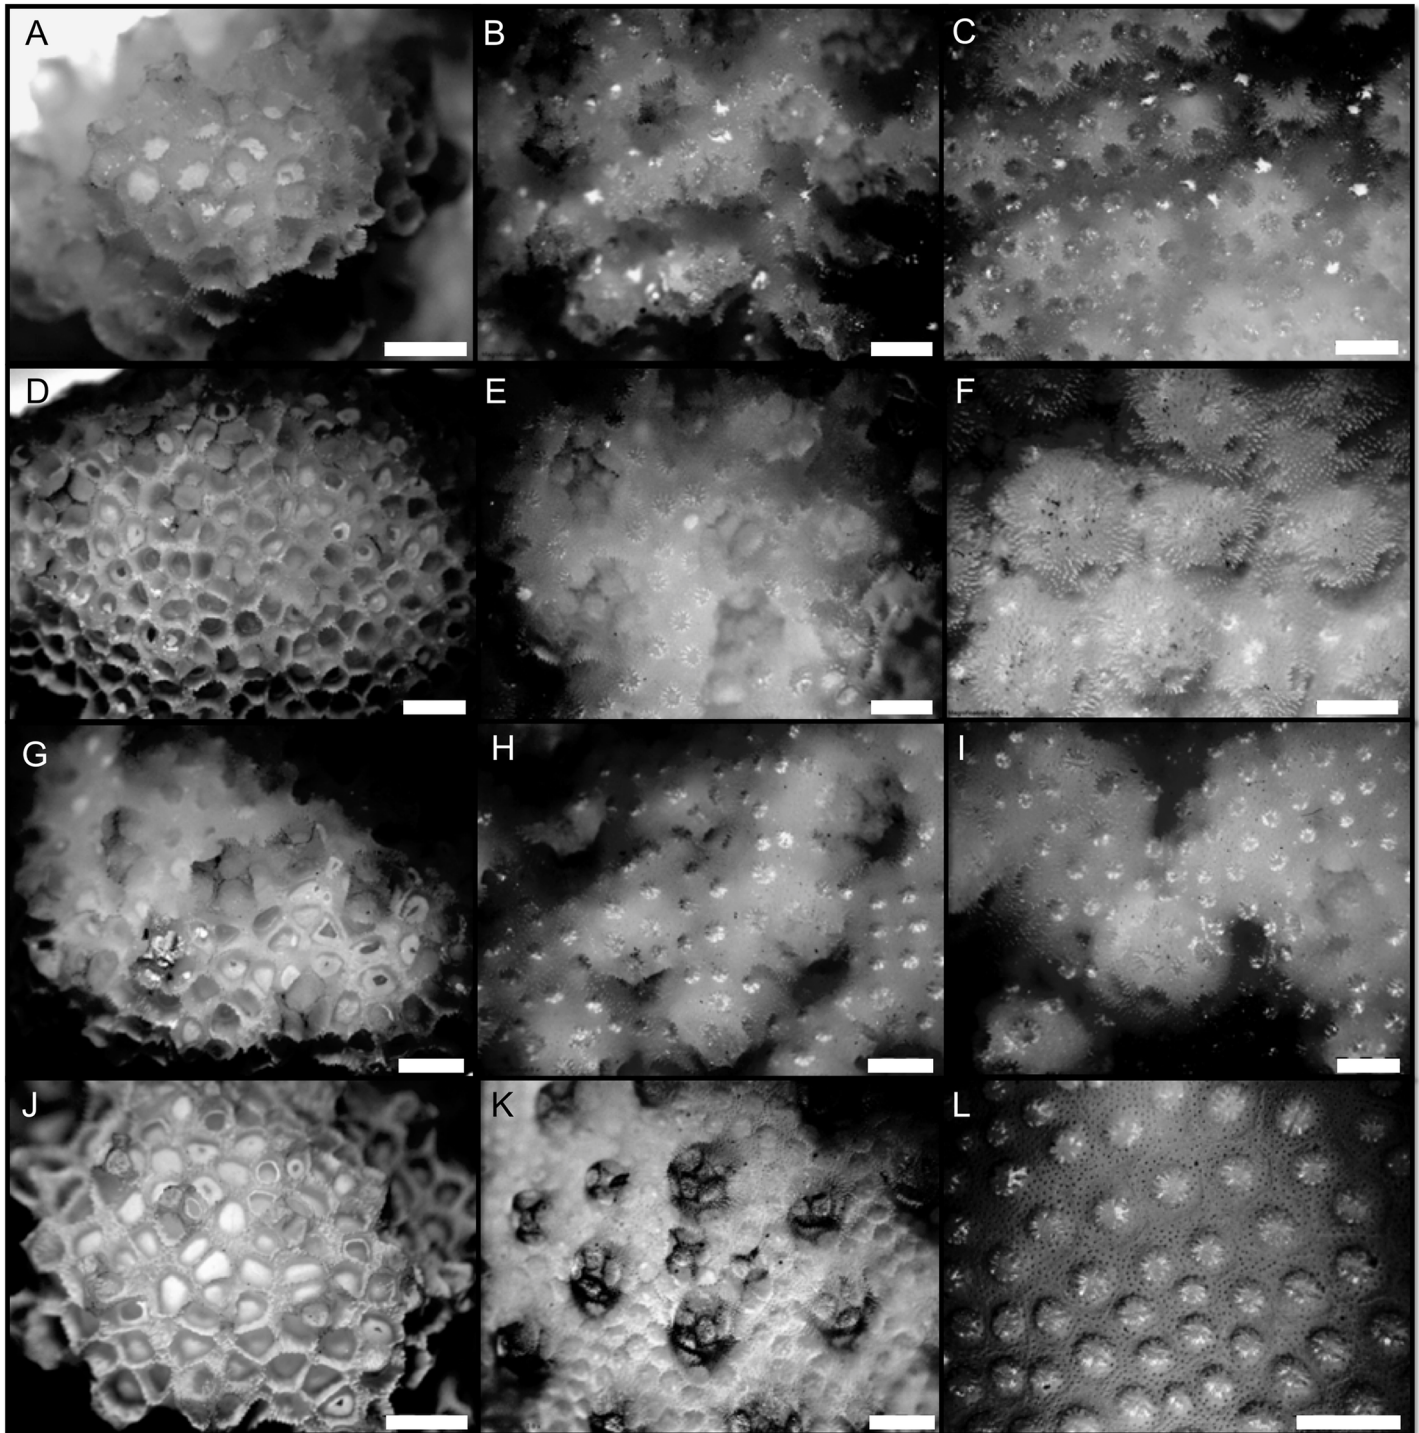

**Fig 3. Skeletal structure of 3 distinct morphological regions (apex, branch, base) of *Pocillopora verrucosa* collected from 4 depth ranges (7m, 15m, 23-30m, 38-45m).** A. 7m apex region B. 7m branch region C. 7m base region D. 15m apex region E. 15m branch region F. 15m base region G. 30m apex region H. 30m branch region I. 30m base region J. 45m apex region K. 45m branch region L. 45m base region. Scale bar equals 2 mm.

<https://doi.org/10.1371/journal.pone.0202586.g003>

verruca spacing, base spinule spacing, base septa width, base septa length, base verruca height, branch septa width, branch corallite spacing, branch verruca spacing, colony density, terminal

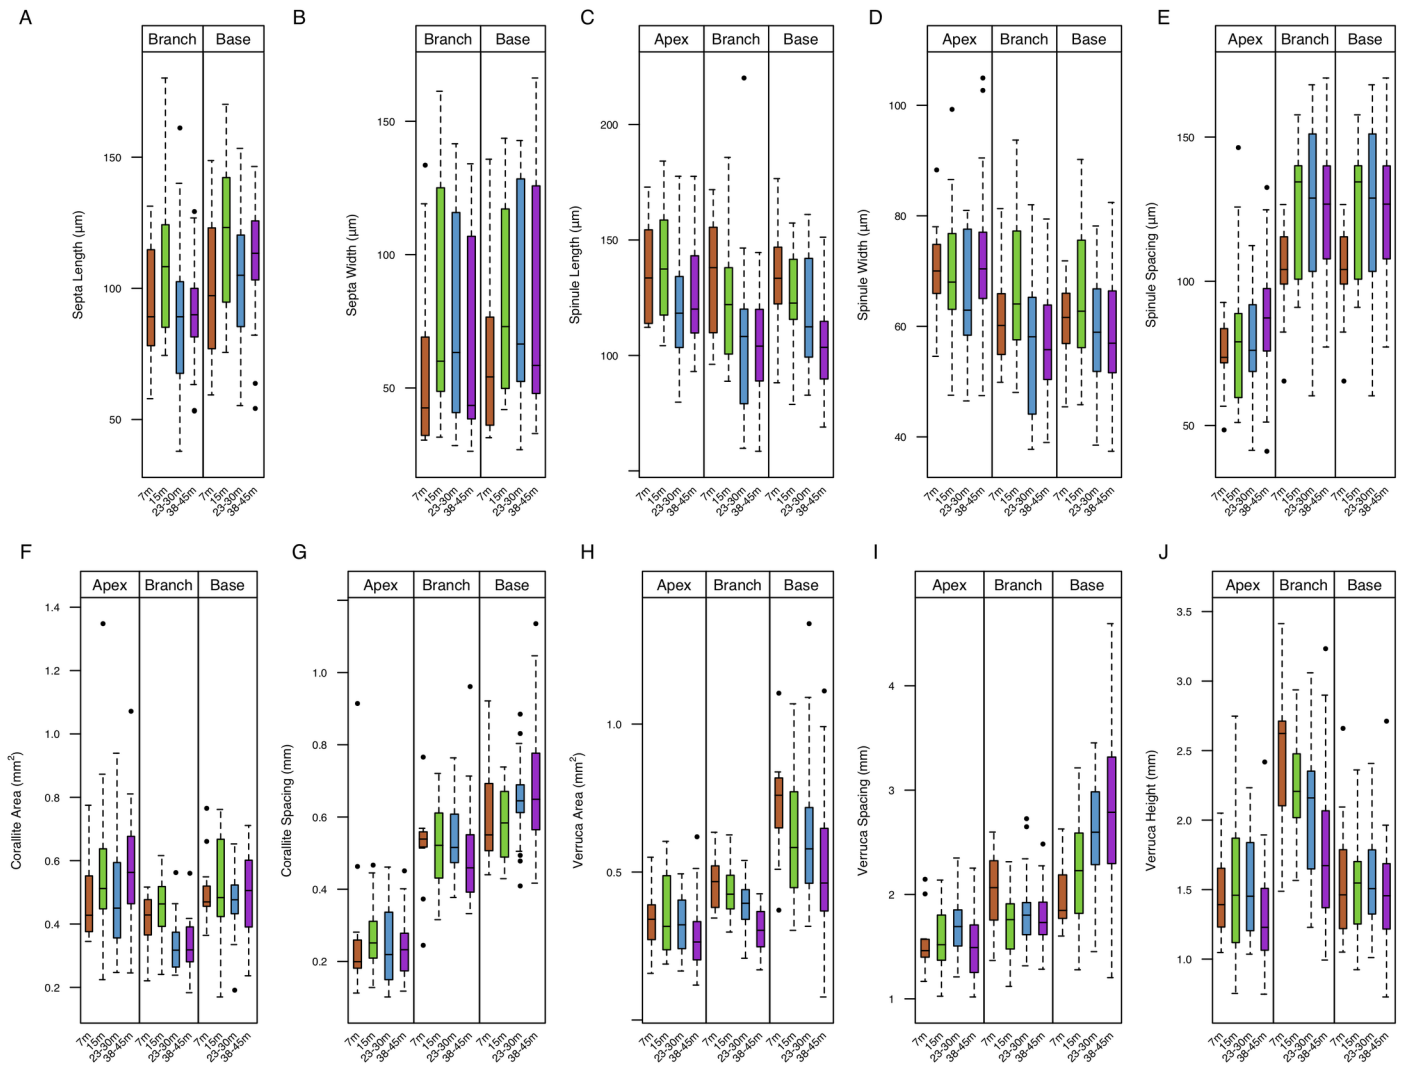

**Fig 4. Variation in microstructural characters from the apex, branch, and base regions of the corallum in response to depth.** A. Septa Length B. Septa Width C. Spinule Length D. Spinule Width E. Spinule Spacing F. Corallite Area G. Corallite Spacing H. Verruca Area I. Verruca Spacing J. Verruca Height. Boxes indicate median ± quartiles. Whiskers indicate 5<sup>th</sup> and 95<sup>th</sup> percentiles, respectively.

<https://doi.org/10.1371/journal.pone.0202586.g004>

branch minimum width, pre-terminal branch maximum width, pre-terminal branch minimum width, terminal branch maximum length, and mean branching angle.

Canonical discriminant analysis of all morphological characters by depth (Fig 6) shows a high degree of overlap in canonical space for 7m and 15m groups. All groups partially overlap each other to some degree, except for the 7m and 38-45m groups, which do not intersect at all. First and second canonical variates account for 91.6% of observed among-group variance. Only the first canonical variate explains the observed differentiation between depth groups ( $LR_{C1} = 0.057$ ,  $F_{C1\ 105,141} = 2.14$ ,  $p < 0.001$ ;  $LR_{C2} = 0.29$ ,  $F_{C2\ 68,96} = 1.17$ ,  $p = 0.23$ ). Differentiation between group centroids in canonical space by means of a permutation test for homogeneity of multivariate dispersions was non-significant ( $F_{3,81} = 1.33$ ,  $p = 0.27$ ) (Figure A in S3 Fig). Vectors 9, 11, 13, 15, 22—corresponding to base verruca spacing, branch corallite area, branch verruca area, branch verruca height and base spinule length, respectively—possessed noteworthy discriminatory potential.



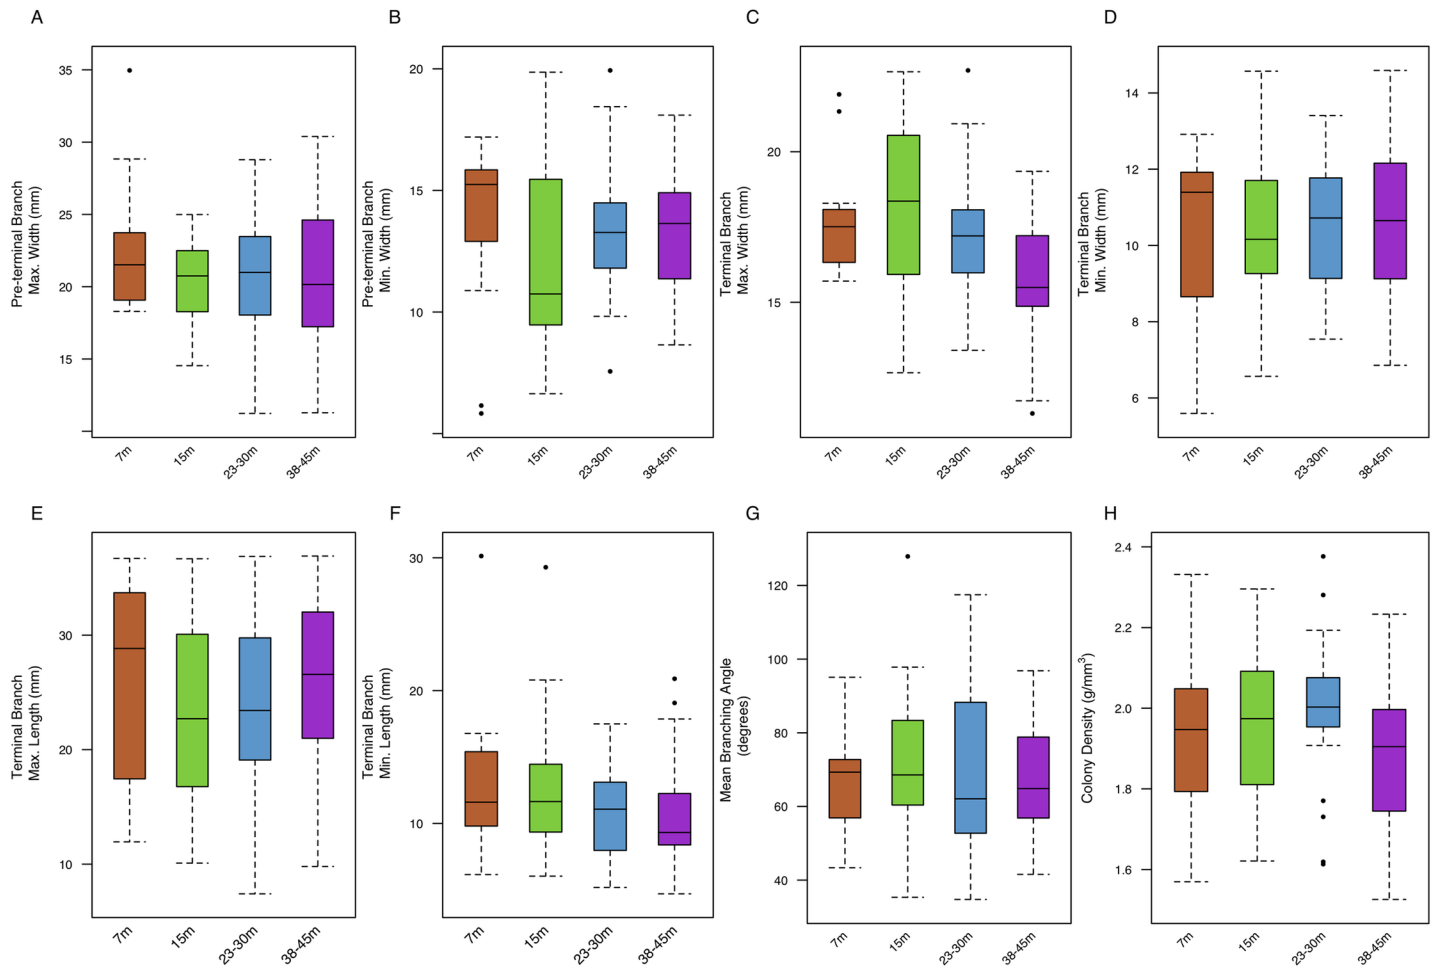

**Fig 5. Variation in macrostructural characters of *P. verrucosa* in response to depth.** A. Pre-terminal Branch Maximum Width B. Pre-terminal Branch Minimum Width C. Terminal Branch Maximum Width D. Terminal Branch Minimum Width E. Terminal Branch Maximum Length F. Terminal Branch Minimum Length G. Branching Angle H. Colony Density. Boxes indicate median  $\pm$  quartiles. Whiskers indicate 5<sup>th</sup> and 95<sup>th</sup> percentiles, respectively.

<https://doi.org/10.1371/journal.pone.0202586.g005>

Canonical discriminant analysis of all characters by site (Fig 7) shows Guiwan uncoupled from the overlapping Dabaisha and Gongguan groups. First and second canonical variates account for 100% of observed among-group variance. Canonical correlations between the sites and the first and second canonical variates were significant ( $LR_{C1} = 0.03$ ,  $F_{70,96} = 6.13$ ,  $p < 0.001$ ;  $LR_{C2} = 0.45$ ,  $F_{34,49} = 1.73$ ,  $p = 0.03$ ). A permutation test for homogeneity of multivariate dispersions does not show significant differentiation between group centroids ( $F_{2,82} = 0.80$ ,  $p = 0.45$ ) (Figure B in S3 Fig). Discriminant vectors by site include 3, 16, 17, 33, 34, 35 which correspond to apex verruca area, branch septa width, branch septa length, base septa width, pre-terminal branch minimum width, terminal branch maximum length, and terminal branch minimum length, respectively.

### Discussion

Here we demonstrate variation in 17 micro- and 2 macrostructural characters, 8 of which are novel, in colonies of *Pocillopora verrucosa* occurring along a depth gradient. This study is among a few that examine variation in morphological traits within a mesophotic setting (e.g. [80]). Our results show substantial overlap between 7 and 15m groups in canonical space,

**Table 3. Correlation between morphological characters and depth.** Significant characters are presented in boldface.

| Trait                             | Abbreviation | Kendall's $\tau$ | z      | p-value         |
|-----------------------------------|--------------|------------------|--------|-----------------|
| Apex Spinule Length               | 20           | -0.17            | -2.1   | <b>0.033</b>    |
| Apex Spinule Width                | 23           | 0.042            | 0.50   | 0.61            |
| Apex Spinule Spacing              | 26           | 0.27             | 3.27   | <b>0.0010</b>   |
| Apex Corallite Area               | 1            | 0.010            | 0.12   | 0.89            |
| Apex Corallite Spacing            | 2            | -0.10            | -1.23  | 0.21            |
| Apex Verruca Area                 | 3            | -0.22            | -2.71  | <b>0.0065</b>   |
| Apex Verruca Spacing              | 4            | -0.061           | -0.74  | 0.45            |
| Apex Verruca Height               | 5            | -0.17            | -2.08  | <b>0.037</b>    |
| Base Spinule Length               | 22           | -0.35            | -4.29  | <b>1.7e-05</b>  |
| Base Spinule Width                | 25           | -0.22            | -2.68  | <b>0.0071</b>   |
| Base Spinule Spacing              | 28           | 0.10             | 1.26   | 0.20            |
| Base Septa Width                  | 18           | 0.025            | 0.31   | 0.75            |
| Base Septa Length                 | 19           | -0.070           | -0.85  | 0.39            |
| Base Corallite Area               | 6            | 0.22             | 0.82   | <b>0.018</b>    |
| Base Corallite Spacing            | 7            | 0.23             | 2.85   | <b>0.0043</b>   |
| Base Verruca Area                 | 8            | -0.26            | -3.23  | <b>0.0012</b>   |
| Base Verruca Spacing              | 9            | 0.37             | 4.56   | <b>4.99e-06</b> |
| Base Verruca Height               | 10           | -0.047           | -0.57  | 0.56            |
| Branch Spinule Length             | 21           | -0.26            | -3.21  | <b>0.0013</b>   |
| Branch Spinule Width              | 24           | -0.20            | -2.52  | <b>0.011</b>    |
| Branch Spinule Spacing            | 27           | 0.19             | 2.37   | <b>0.017</b>    |
| Branch Septa Width                | 16           | -0.087           | -1.05  | 0.29            |
| Branch Septa Length               | 17           | -0.23            | -2.79  | <b>0.0052</b>   |
| Branch Corallite Area             | 11           | -0.30            | -3.69  | <b>0.00022</b>  |
| Branch Corallite Spacing          | 12           | -0.14            | 1.81   | 0.069           |
| Branch Verruca Area               | 13           | -0.50            | -6.16  | <b>7.1e-10</b>  |
| Branch Verruca Spacing            | 14           | -0.14            | -1.78  | 0.073           |
| Branch Verruca Height             | 15           | -0.39            | -4.81  | <b>1.4e-06</b>  |
| Colony Density                    | 29           | -0.13            | -1.61  | 0.10            |
| Terminal Branch Maximum Width     | 30           | -0.26            | -3.18  | <b>0.0014</b>   |
| Terminal Branch Minimum Width     | 31           | 0.028            | 0.0023 | 0.97            |
| Pre-terminal Branch Maximum Width | 32           | -0.067           | -0.81  | 0.41            |
| Pre-terminal Branch Minimum Width | 33           | -0.018           | -0.22  | 0.82            |
| Terminal Branch Maximum Length    | 34           | -0.037           | -0.45  | 0.65            |
| Terminal Branch Minimum Length    | 35           | -0.22            | -2.73  | <b>0.0062</b>   |
| Mean Branching Angle              | 36           | 0.041            | 0.49   | 0.62            |

<https://doi.org/10.1371/journal.pone.0202586.t003>

suggesting that these groups are morphologically indistinguishable (Fig 6). In contrast, there is no overlap between the 7 and 38-45m groups, which is indicative of strong morphological divergence. Limited separation between groups implies that morphological variation has a gradational nature, while partial intersection between groups suggests that some characters are invariant in response to depth. Because we were unable to determine whether group discrimination originates from among-group dispersion or from actual variation in distance to centroid, interpretation of these results warrants caution (Figure A in S3 Fig). Character vectors possessing highest discriminatory potential (Fig 6) were coincident with characters possessing highest correlation coefficients (Table 3). 60% of microstructural characters and 25% of macrostructural characters exhibited significant variation with depth, suggesting that

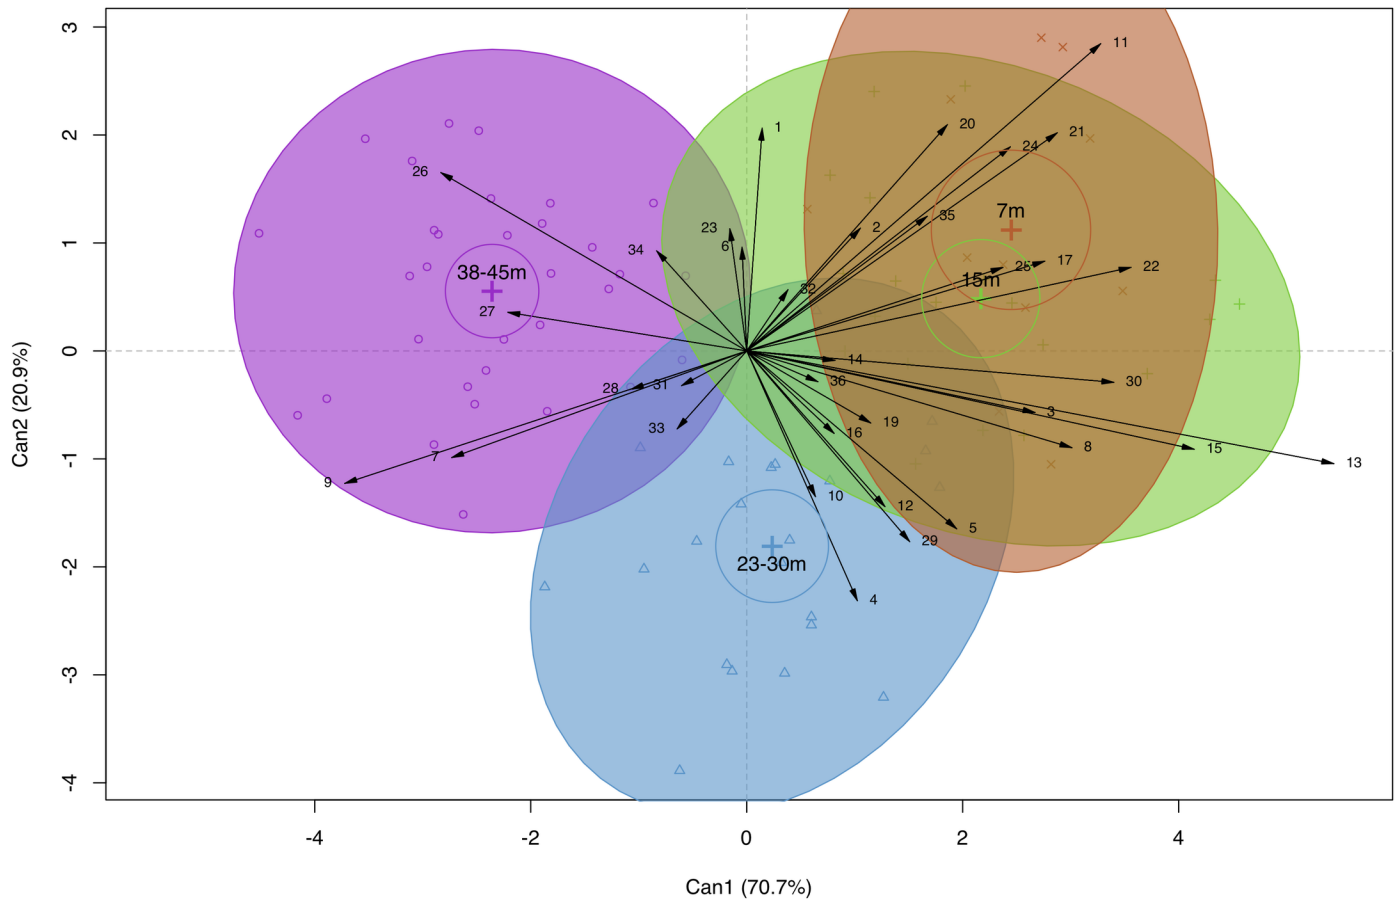

**Fig 6. Canonical discriminant analysis of mean structural and microstructural character means in *P. verrucosa* sorted by depth.** Plot of first two canonical variables (Can1 vs. Can2) with loadings in parentheses. Crosses represent group centroids, circles surrounding crosses represent 95% confidence coefficient for group centroids, ellipses represent 95% coverage probability. Biplot displays the magnitude and direction of each character's effect on group discrimination. Highly collinear characters are excluded. Vector abbreviations follow Table 3.

<https://doi.org/10.1371/journal.pone.0202586.g006>

acclimatization to depth is manifested primarily at the microstructural level. Canonical discrimination between sites (Fig 7) reveals that colonies from Guiwan—an exposed, high water velocity site—are morphologically distinct from those originating from Dabaisha and Gongguan—which are sheltered, low-velocity sites [70]. Site discrimination is principally driven by branch and septal characters, which indicates that differences between site manifest at both the micro- and macrostructural level.

We found that increases in depth correspond to shorter spinules in all regions, narrower spinules in the base and branch regions, and increases in spinule spacing in the apex and branch regions. To the best of our knowledge, no studies have reported changes in spinule morphology in relation to depth. However, specimens of *Pocillopora damicornis* exposed to high wave-action presented reductions in the length and width of skeletal spines (spinules) [72], indicating that spinule morphology is sensitive to environmental gradients. Skeletal spinules play a role in the adhesion of the tissue-skeleton interface [72]. Yet, in this context, we believe the variation in spinule morphology is best explained by variation in growth and calcification rates with depth [81].

Our results do not support significant differentiation between base and branch septa width and base septa length with depth, yet we did observe significant reductions in branch septa

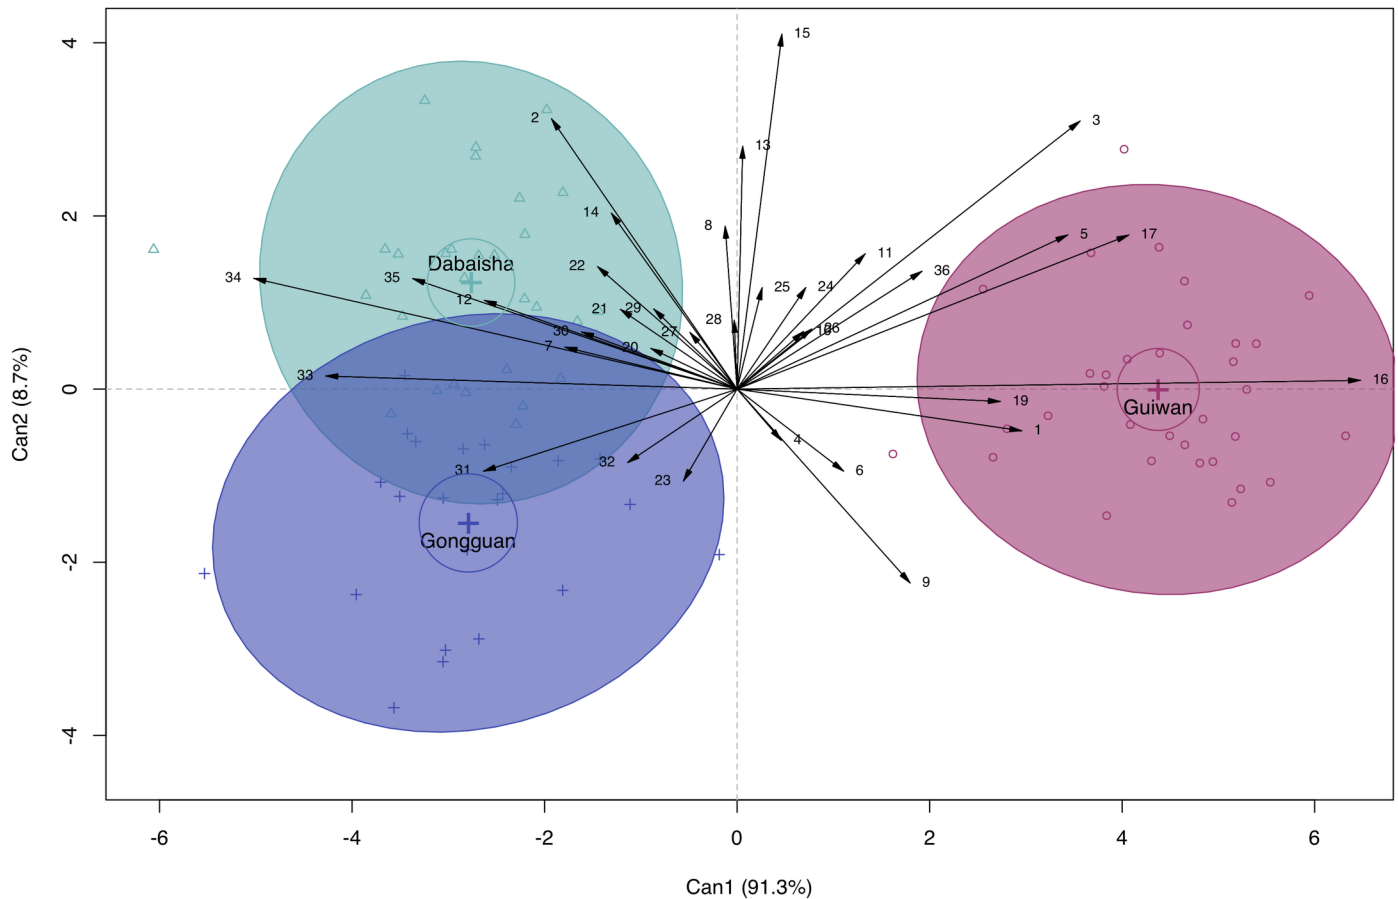

**Fig 7. Canonical discriminant analysis of structural and microstructural character means of *P. verrucosa* sorted by site.** Plot of first two canonical variables (Can1 vs. Can2) with loadings in parentheses. Crosses represent group centroids, circles surrounding crosses represent 95% confidence coefficient for group centroids, ellipses represent 95% coverage probability. Biplot displays the magnitude and direction of each character's effect on group discrimination. Highly collinear characters are excluded. Vector abbreviations follow Table 3.

<https://doi.org/10.1371/journal.pone.0202586.g007>

length in our specimens. In *Montastraea cavernosa*, decreased exposure to light can produce corallites with fewer septa [82]. Septal length and width have also been shown to increase with depth [34] however, this contrasts with a recent study where septa were significantly shortened in mesophotic *M. cavernosa* [80]. Cross-transplanted colonies of *Goniastrea pectinata* developed longer septa when transplanted to deeper stations to maximize light efficiency at low irradiances [83]. The effects of depth on septal characters in the current study are inconsistent with the literature. Surprisingly, branch septa width was a significant factor in site discrimination, suggesting that septa morphology may be more sensitive to other environmental parameters such as water velocity and flow.

Our data show that corallite area in the branch regions correlate negatively with depth, while corallite spacing increases in the base regions. Corallite size and inter-corallite spacing are traits that vary with depth, paralleling reductions in ambient light intensity [84–85]. In *Montastraea cavernosa*, decreased exposure to light can produce smaller corallites [82] and reductions in corallite spacing [34]. Polyp living space (corallite spacing) increases with depth in *Dipsastraea pallida* (ex. *Favia pallida*) [86]. Modelling studies based on morphometric data in *Galaxea fascicularis* demonstrate that corallite width and inter-corallite distance decreased while corallite height and density increased when exposed to reductions in incident light

associated with depth [87]. Smaller calyx diameters produce smaller angles of inclination within the calyx walls, which could increase shading; conversely, larger corallites allow light collection from greater angles, resulting in greater light capture [83]. Here, corallite size appears to vary non-linearly with depth, which could indicate shifts in the relative reliance of depth-generalist corals on autotrophy and heterotrophy at depth [88–89].

We determined that as depth increases, verruca size diminishes in all regions and verrucae become shorter within the apex and branch regions. Correspondingly, colonies of *Montipora capitata* produced more tuberculae, protrusions similar to verrucae in *P. verrucosa*, in high-light environments [90]. We postulate that taller and larger verrucae may provide protective shading in high-light environments while smaller and shorter verrucae may reduce self-shading, and increase light capture, in deeper environments. Our data show that verruca spacing increases with depth in the base region of the corallum, resulting in a relatively smooth surface. Colonies in deep water may preferentially adopt flatter colony morphologies to enhance exposure to incident light [91–92], which creates a shaded region on the underside of the colony. We postulate that this effect could be an acclimatory response to a low-light microenvironment [93–95] and provides evidence for the role of verrucae as photo-protective structures.

We did not observe any significant change in colony density with depth. This contrasts with other studies, where decreased exposure to light reduces calcification rates [96], and linear growth rates [86] resulting in increased colony density with depth [81]. In [73], comparisons of colony densities of 9 corals, showed reduced colony density with depth for most species, however, as in our study, results for *P. verrucosa* were inconclusive. We report negative correlations between terminal branch maximum width and terminal branch minimum length with depth, a result that parallels other studies in the literature. Branch thickness decreases in *Stylophora pistillata* occurring along a depth gradient ranging down to 65m [29]. Branch spacing and branch tip diameter increased and decreased, respectively, in colonies of *Madracis mirabilis* along a depth gradient [13]. Branch spacing was larger and branch length was shorter in *Acropora humilis* colonies from deep habitats compared to shallow-water conspecifics [37]. These changes in branch structure could stem from reduced growth rates with depth; however, branch characters were found to be important for site discrimination (Fig 7). Because branch morphology is strongly responsive to water flow [64–68], we propose that differential water velocities among sites could better explain differences in branch morphology.

Plasticity enables a species to occupy a range of microhabitats within the reef and may facilitate adaptation tailored to specific environmental conditions [5,6]. Irradiance and hydrodynamics are environmental traits known to exert the greatest effect over plasticity in corals [6,13]; however, sedimentation [97], nutrient availability [98], turbidity [99–100], and inter-species interactions [101] have also been shown to alter colony morphology. It is possible that water flow may preferentially exert selective influence over macrostructural characters such as branch spacing, diameter and thickness [13, 67, 74, 102], while light availability may be influential at both macrostructural and microstructural levels [37, 103–105]. Locally, light availability (PAR) exhibits substantial reduction along a vertical gradient [68]. Water velocity at 50m is also attenuated compared to 10m [70]. Little variation was observed in other environmental variables (temperature, salinity) for which data exist. Data on local sedimentation rates and nutrient availability, which may covary along depth profiles, are unavailable; thus we cannot infer their roles within the context of this study. Fine-scale long-term monitoring of environmental parameters could be more conclusive. Nevertheless, we hypothesize that light and current are major environmental drivers behind morphological variation observed in our study.

Morphological traits often overlap in *Pocillopora* [52], blurring obvious transitions between species [10]. The confounded taxonomy of the genus is particularly encumbering in the field,

where estimates of diversity require visual identification based on morphology and are impractical to achieve with genetic methods. Thus, identifying diagnostic morphological characters is essential for morphological species discrimination [10]; yet no studies have identified stable traits in the context of environmentally-induced plasticity. Here we identify various characters that exhibit little plasticity along a depth gradient. Detailed comparisons of morphology within and among other *Pocillopora* species, and done within the context of environmental plasticity, could help assess their utility as taxonomic markers. Avoiding species misidentification in *Pocillopora* is a real challenge because misidentified specimens can bias results (as discussed in [106]).

Morphological plasticity can occur in response to environmental conditions (phenotypic plasticity), as a product of genetic differentiation, or as a combination of both [6]. The relative contribution of environment and genetics to morphological plasticity can be species-dependent [107]: some species, such as *Stylophora pistillata*, are known to display extensive plasticity in response to environmental conditions [108, 109]; yet others, like *Pavona cactus*, are phenotypically stable and show little or no response to environmental variation [110].

Challenges in the taxonomy of *Pocillopora* underscore the relevance of implementing high-resolution morphometric methods and highlight the importance of integrating morphological and molecular approaches. To better estimate the role plasticity plays in determining the vulnerability of species to climate change [111], transplantation of clonal replicates over a range of environments [112, 113] can untangle sources of plasticity (environmental vs. fixed factors). Integration of omics approaches can further clarify the mechanisms behind the transgenerational transfer of plastic responses [28, 114] and should be considered in future studies.

## Supporting information

**S1 Fig. Correlation matrix of all morphological characters for verification of non-collinearity.** Characters are numbered according to Table 3 and ordered by decreasing first principal component. Area and color of pies denotes absolute value of pairwise Pearson's correlation coefficients. Red and blue hues represent positive and negative correlations, respectively. Only significant correlations are shown.

(TIFF)

**S2 Fig. Scaled kernel density plots of discriminant morphological characters by depth.** Distributions are coded by depth. Red: 7m, green: 15m, blue: 23-30m, and purple: 38-45m.

(TIFF)

**S3 Fig. Distance to centroid in multivariate space.** A. By depth B. By site. Boxes indicate median  $\pm$  quartiles. Whiskers indicate 5<sup>th</sup> and 95<sup>th</sup> percentiles, respectively.

(TIFF)

**S1 Dataset. Spreadsheet containing raw data.**

(XLSX)

## Acknowledgments

The authors would also like to thank Dr. Yoko Nozawa for the use of his microscope, Yeng Su for assistance with technical diving and sample collection, Mathilde Loubeyres for assistance with graphic design, the Taitung County Government for issuance of collection permits, and staff of Green Island Marine Research Station and the Coral Reef Evolutionary Ecology and Genetics Laboratory, Academia Sinica for logistical assistance.

## Author Contributions

**Conceptualization:** Derek Soto, Stephane De Palmas, Vianney Denis, Chaolun Allen Chen.

**Data curation:** Derek Soto, Stephane De Palmas, Vianney Denis.

**Formal analysis:** Derek Soto, Stephane De Palmas, Vianney Denis, Chaolun Allen Chen.

**Funding acquisition:** Derek Soto, Stephane De Palmas, Vianney Denis, Chaolun Allen Chen.

**Investigation:** Derek Soto, Stephane De Palmas.

**Methodology:** Derek Soto, Stephane De Palmas, Ming Jay Ho.

**Project administration:** Chaolun Allen Chen.

**Resources:** Derek Soto, Ming Jay Ho, Chaolun Allen Chen.

**Software:** Derek Soto.

**Supervision:** Vianney Denis.

**Validation:** Derek Soto, Stephane De Palmas, Vianney Denis.

**Visualization:** Derek Soto, Vianney Denis.

**Writing – original draft:** Derek Soto, Stephane De Palmas, Chaolun Allen Chen.

**Writing – review & editing:** Derek Soto, Stephane De Palmas, Vianney Denis, Chaolun Allen Chen.

## References

1. Prada C, Schizas NV, Yoshioka PM. Phenotypic plasticity or speciation? A case from a clonal marine organism. *BMC Evol Biol.* 2008; 8: 47. <https://doi.org/10.1186/1471-2148-8-47> PMID: 18271961
2. Fusco G, Minelli A. Phenotypic plasticity in development and evolution: facts and concepts. *Philos Trans R Soc Lond B Biol Sci* 2010; 365: 547–556. <https://doi.org/10.1098/rstb.2009.0267> PMID: 20083631
3. Pfennig DW, Wund MA, Snell-Rood EC, Cruickshank T, Schlichting CD, Moczek AP. Phenotypic plasticity's impacts on diversification and speciation. *Trends Ecol Evol.* 2010; 25: 459–467. <https://doi.org/10.1016/j.tree.2010.05.006> PMID: 20557976
4. Forsman Z, Wellington GM, Fox GE, Toonen RJ. Clues to unraveling the coral species problem: distinguishing species from geographic variation in *Porites* across the Pacific with molecular markers and microskeletal traits. *PeerJ.* 2015; 3: e751. <https://doi.org/10.7717/peerj.751> PMID: 25674364
5. Kenkel CD, Matz MV. Gene expression plasticity as a mechanism of coral adaptation to a variable environment. *Nat Ecol Evol.* 2017; 1: 0014.
6. Todd PA. Morphological plasticity in scleractinian corals. *Biol Rev.* 2008; 83: 315–37. PMID: 18979594
7. Budd AF. Longterm patterns of morphological variation within and among species of reef-corals and their relationship to sexual reproduction. *Syst Bot.* 1990; 15: 150–165.
8. Smith H, Epstein H, Torda G. The molecular basis of differential morphology and bleaching thresholds in two morphs of the coral *Pocillopora acuta*. *Sci Rep.* 2017; 7: 10066. <https://doi.org/10.1038/s41598-017-10560-2> PMID: 28855618
9. Budd AF, Romano SL, Smith ND, Barbeitos MS. Rethinking the phylogeny of scleractinian corals: a review of morphological and molecular data. *Integr Comp Biol.* 2010; 50: 411–27. <https://doi.org/10.1093/icb/icq062> PMID: 21558212
10. Schmidt-Roach S, Miller KJ, Lundgren P, Andreakis N. With eyes wide open: a revision of species within and closely related to the *Pocillopora damicornis* species complex (Scleractinia; Pocilloporidae) using morphology and genetics. *Zool J Linnean Soc.* 2014; 170: 1–33.
11. Kleypas JA, McManus JW, Menez LA. Environmental limits to coral reef development: where do we draw the line? *Am Zool.* 1999; 39: 146–59.
12. Lesser MP, Slattery M, Stat M, Ojimi M, Gates RD, Grottoli A. Photoacclimatization by the coral *Montastraea cavernosa* in the mesophotic zone: light, food, and genetics. *Ecology.* 2010; 91: 990–1003. PMID: 20462114

13. Bruno JF, Edmunds PJ. Clonal variation for phenotypic plasticity in the coral *Madracis mirabilis*. *Ecology*. 1997; 78: 2177–2190.
14. Pyle RL, Boland R, Bolick H, Bowen BW, Bradley CJ, Kane C, et al. A comprehensive investigation of mesophotic coral ecosystems in the Hawaiian Archipelago. *PeerJ*. 2016; 4:e2475. <https://doi.org/10.7717/peerj.2475> PMID: 27761310
15. Falkowski PG, Dubinsky Z. Light-shade adaptation of *Stylophora pistillata*, a hermatypic coral from the Gulf of Eilat. *Nature*. 1981; 289: 172–174.
16. Tityanov EA, Tityanova TV, Yamazato K, Van Woesik R. Photo-acclimation dynamics of the coral *Stylophora pistillata* to low and extremely low light. *J Exp Mar Biol Ecol*. 2001; 263: 211–225.
17. Eyal G, Wiedenmann J, Grinblat M, D'Angelo C, Kramarsky-Winter E, Treibitz T, et al. Spectral diversity and regulation of coral fluorescence in a mesophotic reef habitat in the Red Sea. *PLoS ONE*. 2015; 10: e0128697. <https://doi.org/10.1371/journal.pone.0128697> PMID: 26107282
18. Richier S, Cottalorda JM, Guillaume MM, Fernandez C, Allemand D, Furla P. Depth-dependant response to light of the reef building coral, *Pocillopora verrucosa*: Implication of oxidative stress. *J Exp Mar Biol Ecol*. 2008; 357: 48–56.
19. Nir O, Gruber DF, Einbinder S, Kark S, Tchernov D. Changes in scleractinian coral *Seriatopora hystrix* morphology and its endocellular *Symbiodinium* characteristics along a bathymetric gradient from shallow to mesophotic reef. *Coral Reefs*. 2011; 30: 1089.
20. Fricke HW, Vareschi E, Schlichter D. Photoecology of the coral *Leptoseris fragilis* in the Red Sea twilight zone (an experimental study by submersible). *Oecologia*, 1983; 73: 371–381.
21. Kahng SE, Garcia-Sais JR, Spalding HL, Brokovich E, Wagner D, Weil E, et al. Community ecology of mesophotic coral reef ecosystems. *Coral Reefs*. 2010; 29: 255–275.
22. Marcelino LA, Westneat MW, Stoyneva V, Henss J, Rogers JD, Radosevich A, et al. Modulation of light-enhancement to symbiotic algae by light-scattering in corals and evolutionary trends in bleaching. *PLoS ONE*. 2013; 8: e61492. <https://doi.org/10.1371/journal.pone.0061492> PMID: 23630594
23. Glasl B, Bongaerts P, Elisabeth NH, Hoegh-Guldberg O, Herndl GJ, Frade PR. Microbiome variation in corals with distinct depth distribution ranges across a shallow–mesophotic gradient (15–85 m). *Coral Reefs*. 2017; 36: 447–452. <https://doi.org/10.1007/s00338-016-1517-x> PMID: 28579915
24. Schlichter D, Weber W, Fricke HW. A chromatophore system in the hermatypic, deep-water coral *Leptoseris fragilis* (Anthozoa: Hexacorallia). *Mar Biol*. 1985; 89: 143–147.
25. Bongaerts P, Riginos C, Ridgway T, Sampayo EM, van Oppen MJH, Englebert N, et al. Genetic divergence across habitats in the widespread coral *Seriatopora hystrix* and its associated *Symbiodinium*. *PLoS ONE*. 2010; 5: e10871. <https://doi.org/10.1371/journal.pone.0010871> PMID: 20523735
26. Bongaerts P, Frade PR, Ogier JJ, Hay KB, van Bleijswijk J, Englebert N, et al. Sharing the slope: depth partitioning of agariciid corals and associated *Symbiodinium* across shallow and mesophotic habitats (2–60 m) on a Caribbean reef. *BMC Evol Biol*. 2013; 13: 205. <https://doi.org/10.1186/1471-2148-13-205> PMID: 24059868
27. Muir P, Wallace C, Bridge TC, Bongaerts P. Diverse staghorn coral fauna on the mesophotic reefs of north-east Australia. *PLoS ONE*. 2015; 10: e0117933. <https://doi.org/10.1371/journal.pone.0117933> PMID: 25714341
28. van Oppen MJH, Oliver JK, Putnam HM, Gates RD. Building coral reef resilience through assisted evolution. *Proc Natl Acad Sci USA*. 2015; 112: 2307–2313. <https://doi.org/10.1073/pnas.1422301112> PMID: 25646461
29. Einbinder S, Mass T, Brokovich E, Dubinsky Z, Erez J, Tchernov D. Changes in morphology and diet of the coral *Stylophora pistillata* along a depth gradient. *Mar Ecol Prog Ser*. 2009; 381: 167–174.
30. Anthony KR, Hoegh-Guldberg O. Variation in coral photosynthesis, respiration and growth characteristics in contrasting light microhabitats: an analogue to plants in forest gaps and understoreys?. *Funct Ecol*. 2003; 17: 246–59.
31. Stambler N, Dubinsky Z. Corals as light collectors: an integrating sphere approach. *Coral Reefs*. 2005; 24: 1–9.
32. Klaus JS, Budd AF, Heikoop JM, Fouke BW. Environmental controls on corallite morphology in the reef coral *Montastraea annularis*. *Bull Mar Sci*. 2007; 80: 233–260.
33. West JM, Harvell CD, Walls AM. Morphological plasticity in a gorgonian coral (*Briareum asbestinum*) over a depth cline. *Mar Ecol Prog Ser*. 1993; 94: 61–69.
34. Amaral FD. Morphological variation in the reef coral *Montastrea cavernosa* in Brazil. *Coral Reefs*. 1994; 13: 113–117.
35. Anthony KR, Hoogenboom MO, Connolly SR. Adaptive variation in coral geometry and the optimization of internal colony light climates. *Funct Ecol*. 2005; 19: 17–26.



36. Hoogenboom MO, Connolly SR, Anthony K. Interactions between morphological and physiological plasticity optimize energy acquisition in corals. *Ecology*. 2008; 89: 1144–1154. PMID: [18481538](#)
37. Kaniewska P, Anthony KR, Hoegh-Guldberg O. Variation in colony geometry modulates internal light levels in branching corals, *Acropora humilis* and *Stylophora pistillata*. *Mar Biol*. 2008; 155: 649–660.
38. Calixto-Botía I, Sánchez JA. A case of modular phenotypic plasticity in the depth gradient for the gorgonian coral *Antillogorgia bipinnata* (Cnidaria: Octocorallia). *BMC Evol Biol*. 2017; 17: 55. <https://doi.org/10.1186/s12862-017-0900-8> PMID: [28212607](#)
39. Loya Y, Eyal G, Treibitz T, Lesser MP, Appeldoorn R. Theme section on mesophotic coral ecosystems: advances in knowledge and future perspectives. *Coral Reefs*. 2016; 35: 1–9.
40. Smith EG, D'angelo C, Sharon Y, Tchernov D, Wiedenmann J. Acclimatization of symbiotic corals to mesophotic light environments through wavelength transformation by fluorescent protein pigments. *Proc R Soc B*. 2017; 284: 20170320. <https://doi.org/10.1098/rspb.2017.0320> PMID: [28679724](#)
41. Gonzalez-Zapata FL, Bongaerts P, Ramírez-Portilla C, Adu-Oppong B, Walljasper G, Reyes A, et al. Holobiont diversity in a reef-building coral over its entire depth range in the mesophotic zone. *Front Mar Sci*. 2018; 5: 29.
42. AIMS Coral Fact Sheets [internet]. Townsville: Australian Institute of Marine Sciences. c2018. [cited 2018 April 10]. Available from: <http://coral.aims.gov.au/>
43. Ocean Biogeographic Information System [internet]. Intergovernmental Oceanographic Commission of UNESCO. c2018. [cited 2018 April 10]. Available from: <http://www.iobis.org/>
44. Massé LM, Séré MG, Smit AJ, Schleyer MH. Sexual reproduction in *Pocillopora damicornis* at high latitude off South Africa. *West Indian Ocean J Mar Sci*. 2012; 11: 55–65.
45. Baums IB, Devlin-Durante M, Laing BA, Feingold J, Smith T, Bruckner A, Monteiro J. Marginal coral populations: the densest known aggregation of *Pocillopora* in the Galápagos Archipelago is of asexual origin. *Front Mar Sci*. 2014; 1: 59.
46. Veron JEN, Pichon M. Scleractinia of Eastern Australia. Part I: Families Thamnasteriidae, Astrocoeniidae, Pocilloporidae. Townsville: Australian Government Publishing Service; 1976.
47. Lesser MP, Weis VM, Patterson MR, Jokiel PL. Effects of morphology and water motion on carbon delivery and productivity in the reef coral, *Pocillopora damicornis* (Linnaeus): diffusion barriers, inorganic carbon limitation, and biochemical plasticity. *J Exp Mar Biol Ecol*. 1994; 178: 153–179.
48. Veron JEN. Corals in space and time: the biogeography and evolution of the Scleractinia. Ithaca: Cornell University Press; 1995.
49. Veron JEN. Corals of the World. Vols. 1–3., Townsville: Australian Institute of Marine Science; 2000.
50. Pinzón JH, Sampayo E, Cox E, Chauka LJ, Chen CA, Voolstra CR, et al. Blind to morphology: genetics identifies several widespread ecologically common species and few endemics among Indo-Pacific cauliflower corals (*Pocillopora*, Scleractinia). *J Biogeogr*. 2013; 40: 1595–1608.
51. Schmidt-Roach S, Lundgren P, Miller KJ, Gerlach G, Noreen AM, Andreakis N. Assessing hidden species diversity in the coral *Pocillopora damicornis* from Eastern Australia. *Coral Reefs*. 2013; 32: 161–172.
52. Marti-Puig P, Forsman ZH, Haverkort-Yeh RD, Knapp IS, Maragos JE, Toonen RJ. Extreme phenotypic polymorphism in the coral genus *Pocillopora*; micro-morphology corresponds to mitochondrial groups, while colony morphology does not. *Bull Mar Sci*. 2014; 90: 211–231.
53. Gélin P, Fauvelot C, Mehn V, Bureau S, Rouzé H, Magalon H. Superclone expansion, long-distance clonal dispersal and local genetic structuring in the coral *Pocillopora damicornis* type  $\beta$  in Reunion Island, South Western Indian Ocean. *PLoS ONE*. 2017; 12: e0169692. <https://doi.org/10.1371/journal.pone.0169692> PMID: [28068406](#)
54. Glynn PW, Ault JS. A biogeographic analysis and review of the far eastern Pacific coral reef region. *Coral Reefs*. 2000; 19: 1–23.
55. Köhlmann DH. Composition and ecology of deep-water coral associations. *Helgoländer Meeresunters*. 1983; 36: 183–204.
56. Iryu Y, Nakamori T, Matsuda S, Abe O. Distribution of marine organisms and its geological significance in the modern reef complex of the Ryukyu Islands. *Sediment Geol*. 1995; 99: 243–258.
57. Dai CF, Horng S. Scleractinia Fauna of Taiwan: Robust group. Vol. 2. Taipei: National Taiwan University Press; 2009.
58. Bergman J. Components of a flexible phenotype in two species of scleractinian coral under ocean acidification. [Dissertation]. Northridge: California State University; 2017.
59. Sawall Y, Al-Sofyani A, Hohn S, Banguera-Hinestroza E, Voolstra CR, Wahl M. Extensive phenotypic plasticity of a Red Sea coral over a strong latitudinal temperature gradient suggests limited

- acclimatization potential to warming. *Sci Rep*. 2015; 5: 8940. <https://doi.org/10.1038/srep08940> PMID: 25754672
60. Poli D, Fabbri E, Goffredo S, Airi V, Franzellitti S. Physiological plasticity related to zonation affects *hsp70* expression in the reef-building coral *Pocillopora verrucosa*. *PLoS ONE*. 2017; 12: e0171456. <https://doi.org/10.1371/journal.pone.0171456> PMID: 28199351
  61. Maritorena S, Payri C, Babin M, Claustre H, Bonnafous L, Morel A, Rodière M. Photoacclimatization in the zooxanthellae of *Pocillopora verrucosa* and comparison with a pelagic algal community. *Oceanol Acta*. 2002; 25: 125–134.
  62. Ziegler M, Roder C, Büchel C, Voolstra CR. Niche acclimatization in Red Sea corals is dependent on flexibility of host-symbiont association. *Mar Ecol Prog Ser*. 2015; 533: 149–161.
  63. Ziegler M, Roder CM, Büchel C, Voolstra CR. Limits to physiological plasticity of the coral *Pocillopora verrucosa* from the central Red Sea. *Coral Reefs*. 2014; 33: 1115–1129.
  64. Mass T, Genin A. Environmental versus intrinsic determination of colony symmetry in the coral *Pocillopora verrucosa*. *Mar Ecol Prog Ser*. 2008; 369: 131–137.
  65. Mass T, Brickner I, Hendy E, Genin A. Enduring physiological and reproductive benefits of enhanced flow for a stony coral. *Limnol Ocean*. 2011; 56: 2176–2188.
  66. Paz-García DA, Hellberg ME, García-de-León FJ, Balart EF. Switch between morphospecies of *Pocillopora* corals. *Am Nat*. 2015; 186: 434–440. <https://doi.org/10.1086/682363> PMID: 26655359
  67. Paz-García DA, Aldana-Moreno A, Cabral-Tena RA, García-De-León FJ, Hellberg ME, Balart EF. Morphological variation and different branch modularity across contrasting flow conditions in dominant *Pocillopora* reef-building corals. *Oecologia*. 2015; 178: 207–218. <https://doi.org/10.1007/s00442-014-3199-9> PMID: 25556295
  68. Denis V, Soto D, De Palmas S, Lin YTV, Benayahu Y, Huang YM, et al. Mesophotic coral ecosystems of the world. Loya Y, Puglise KA, Bridge T, editors. New York: Springer; Forthcoming 2018.
  69. Chang MH, Tang TY, Ho CR, Chao SY. Kuroshio-induced wake in the lee of Green Island off Taiwan. *Journal of Geophysical Research: Oceans*. 2013; 118: 1508–1519.
  70. Hsu TW, Liao JM, Liang SJ, Tzang SY, Doong DJ. Assessment of Kuroshio current power test site of Green Island, Taiwan. *Renewable Energy*. 2015; 81: 853–863.
  71. Graus RR, Macintyre IG. Variation in growth forms of the reef coral *Montastrea annularis* (Ellis and Solander): a quantitative evaluation of growth response to light distribution using computer simulation. *Smithson Contrib Mar Sci*. 1982; 12: 441–464.
  72. Brown BE, Hewit R, Le Tissier MD. The nature and construction of skeletal spines in *Pocillopora damicornis* (Linnaeus). *Coral Reefs*. 1983; 2: 81–89.
  73. Ross MA. A quantitative study of the stony coral fishery in Cebu, Philippines. *Mar Ecol*. 1984; 5: 75–91.
  74. Kaandorp JA. Morphological analysis of growth forms of branching marine sessile organisms along environmental gradients. *Mar Biol*. 1999; 134: 295–306.
  75. Chindapol N, Kaandorp JA, Cronemberger C, Mass T, Genin A. Modelling growth and form of the scleractinian coral *Pocillopora verrucosa* and the influence of hydrodynamics. *PLOS Comput Biol*. 2013; 9: e1002849. <https://doi.org/10.1371/journal.pcbi.1002849> PMID: 23326222
  76. Team RC. R: A language and environment for statistical computing. Vienna: R Foundation for Statistical Computing; 2013.
  77. Hensher DA, Rose JM, Greene WH. Applied choice analysis: a primer. Cambridge: Cambridge University Press; 2005.
  78. Anderson MJ. Distance-based tests for homogeneity of multivariate dispersions. *Biometrics*. 2006 Mar 1; 62: 245–253. <https://doi.org/10.1111/j.1541-0420.2005.00440.x> PMID: 16542252
  79. Friendly M, Fox J. Package Candisc. R: Vienna: A language and environment for statistical computing; 2012.
  80. Goodbody-Gringley G, Waletich J. Morphological plasticity of the depth generalist coral, *Montastraea cavernosa*, on mesophotic reefs in Bermuda. *Ecology*; Forthcoming 2018.
  81. Baker PA, Weber JN. Coral growth rate: variation with depth. *Phys Earth Planet Inter*. 1975; 10: 135–139.
  82. Beltrán-Torres AU, Carricart-Ganivet JP. Skeletal morphologic variation in *Montastraea cavernosa* (Cnidaria: Scleractinia) at Isla Verde Coral Reef, Veracruz, Mexico. *Rev Biol Trop*. 1993; 41: 559–562.
  83. Ow YX, Todd PA. Light-induced morphological plasticity in the scleractinian coral *Goniastrea pectinata* and its functional significance. *Coral Reefs*. 2010; 29: 797–808.
  84. Wijsman-Best M. Habitat-induced modification of reef corals (Faviidae) and its consequences for taxonomy. *Proc 2nd Int Coral Reef Symp* 1974; 2: 217–228.

85. Weber JN, Deines P, Weber PH, Baker PA. Depth related changes in the  $^{13}\text{C}/^{12}\text{C}$  ratio of skeletal carbonate deposited by the Caribbean reef-frame building coral *Montastrea annularis*: further implications of a model for stable isotope fractionation by scleractinian corals. *Geochim Cosmochim Acta*. 1976; 40: 31–39.
86. Cuffey RJ, Pachut JF. Clinal morphological variation along a depth gradient in the living scleractinian reef coral *Favia pallida*: Effects on perceived evolutionary tempos in the fossil record. *Palaios*. 1990; 5: 580–588.
87. Crabbe MJ, Smith DJ. Modelling variations in corallite morphology of *Galaxea fascicularis* coral colonies with depth and light on coastal fringing reefs in the Wakatobi Marine National Park (SE Sulawesi, Indonesia). *Comput Biol and Chem*. 2006; 30: 155–159.
88. Palardy JE, Grottoli AG, Matthews KA. Effects of upwelling, depth, morphology and polyp size on feeding in three species of Panamanian corals. *Mar Ecol Prog Ser*. 2005; 300:79–89.
89. Hoogenboom M, Rodolfo-Metalpa R, Ferrier-Pagès C. Co-variation between autotrophy and heterotrophy in the Mediterranean coral *Cladocora caespitosa*. *J Exp Biol*. 2010; 213: 2399–2409. <https://doi.org/10.1242/jeb.040147> PMID: 20581269
90. Bhagooli R. Light-Induced Production of Tuberculae on Exposed Coral Surfaces of the Coral *Montipora capitata*. *UOM Res J*. 2012; 18: 145–165.
91. Dustan P. Growth and form in the reef-building coral *Montastrea annularis*. *Mar Biol*. 1975; 33: 101–107.
92. Jaubert J. Light, metabolism and growth forms of the hermatypic scleractinian coral *Synaraea convexa* Verrill in the lagoon of Moorea (French Polynesia). *Proc 3rd Int Coral Reef Symp*. 1977; 1: 483–488.
93. Wangpraseurt D, Larkum AW, Ralph PJ, Kühl M. Light gradients and optical microniches in coral tissues. *Front Microbiol*. 2012; 3: 316. <https://doi.org/10.3389/fmicb.2012.00316> PMID: 22969755
94. Wangpraseurt D, Polerecky L, Larkum AW, Ralph PJ, Nielsen DA, Pernice M, et al. The *in-situ* light microenvironment of corals. *Limnol Ocean*. 2014; 59: 917–926.
95. Wangpraseurt D, Pernice M, Guagliardo P, Kilburn MR, Clode PL, Polerecky L, et al. Light microenvironment and single-cell gradients of carbon fixation in tissues of symbiont-bearing corals. *ISME J*. 2016; 10: 788. <https://doi.org/10.1038/ismej.2015.133> PMID: 26241503
96. Gattuso JP, Allemand D, Frankignoulle M. Photosynthesis and calcification at cellular, organismal and community levels in coral reefs: a review on interactions and control by carbonate chemistry. *Am Zool*. 1999; 39: 160–183.
97. Todd PA, Sanderson PG, Chou LM. Morphological variation in the polyps of the scleractinian coral *Favia speciosa* (Dana) around Singapore. *Hydrobiologia*. 2001; 444: 227–235.
98. Kaandorp JA, Lowe CP, Frenkel D, Sloom PM. Effect of nutrient diffusion and flow on coral morphology. *Phys Rev Lett*. 1996; 77: 2328. <https://doi.org/10.1103/PhysRevLett.77.2328> PMID: 10061916
99. Padilla-Gamiño JL, Hanson KM, Stat M, Gates RD. Phenotypic plasticity of the coral *Porites rus*: acclimatization responses to a turbid environment. *J Exp Mar Biol Ecol*. 2012; 434: 71–80.
100. Bessell-Browne P, Negri AP, Fisher R, Clode PL, Duckworth A, Jones R. Impacts of turbidity on corals: The relative importance of light limitation and suspended sediments. *Mar Pollut Bull*. 2017; 117: 161–170. <https://doi.org/10.1016/j.marpolbul.2017.01.050> PMID: 28162249
101. Raymundo LJ. Mediation of growth by conspecific neighbors and the effect of site in transplanted fragments of the coral *Porites attenuata* Nemenzo in the central Philippines. *Coral Reefs*. 2001; 20: 263–272.
102. Filatov MV, Kaandorp JA, Postma M, Van Liere R, Kruszyński KJ, Vermeij MJ, et al. A comparison between coral colonies of the genus *Madracis* and simulated forms. *Proc R Soc Lond B Biol Sci*. 2010; 277: 3555–3561.
103. Kaniewska P, Campbell PR, Fine M, Hoegh-Guldberg O. Phototropic growth in a reef flat acroporid branching coral species. *J Exp Biol*. 2009; 212: 662–667. <https://doi.org/10.1242/jeb.022624> PMID: 19218517
104. Kaniewska P, Magnusson SH, Anthony K, Reef R, Kühl M, Hoegh-Guldberg O. Importance of macro-versus microstructure in modulating light levels inside coral colonies. *J Phycol*. 2011; 47: 846–860. <https://doi.org/10.1111/j.1529-8817.2011.01021.x> PMID: 27020021
105. Rocha RJ, Silva AM, Fernandes MH, Cruz IC, Rosa R, Calado R. Contrasting light spectra constrain the macro and microstructures of scleractinian corals. *PloS ONE*. 2014; 9: e105863. <https://doi.org/10.1371/journal.pone.0105863> PMID: 25170981
106. Johnston EC, Forsman ZH, Flot JF, Schmidt-Roach S, Pinzón JH, Knapp IS, et al. A genomic glance through the fog of plasticity and diversification in *Pocillopora*. *Sci Rep*. 2017; 7: 5991. <https://doi.org/10.1038/s41598-017-06085-3> PMID: 28729652

107. Foster AB. Phenotypic plasticity in the reef corals *Montastraea annularis* (Ellis & Solander) and *Siderastrea siderea* (Ellis & Solander). *J Exp Mar Biol Ecol.* 1979; 39: 25–54.
108. Shaish L, Abelson A, Rinkevich B. How plastic can phenotypic plasticity be? The branching coral *Stylophora pistillata* as a model system. *PLoS ONE.* 2007; 2: e644. <https://doi.org/10.1371/journal.pone.0000644> PMID: 17653271
109. Stefani F, Benzoni F, Yang SY, Pichon M, Galli P, Chen CA. Comparison of morphological and genetic analyses reveals cryptic divergence and morphological plasticity in *Stylophora* (Cnidaria, Scleractinia). *Coral Reefs.* 2011; 30: 1033.
110. Willis BL. Phenotypic plasticity versus phenotypic stability in the reef corals *Turbinaria mesenterina* and *Pavona cactus*. *Proc 5th Int coral Reef Symp* 1985; 4: 107–112.
111. Bay RA, Rose NH, Logan CA, Palumbi SR. Genomic models predict successful coral adaptation if future ocean warming rates are reduced. *Sci. Adv.* 2017; 1: e1701413.
112. Schlichting CD. The evolution of phenotypic plasticity in plants. *Annu Rev Ecol Syst.* 1986; 17: 667–693.
113. Schlichting CD, Pigliucci M. *Phenotypic evolution: a reaction norm perspective.* Sunderland: Sinauer Associates Incorporated; 1998.
114. Torda G, Donelson JM, Aranda M, Barshis DJ, Bay L, Berumen ML, et al. Rapid adaptive responses to climate change in corals. *Nat Clim Change.* 2017; 7: 627.
